# Supplementary material for: Cancer-Associated Fibroblasts Influence Survival in Pleural Mesothelioma: Digital Gene Expression Analysis and Supervised Machine Learning Model
Source: MDPI journal article supplement (doi:10.3390/ijms241512426), 2023-08-04
Supplement: s1 [file s1]

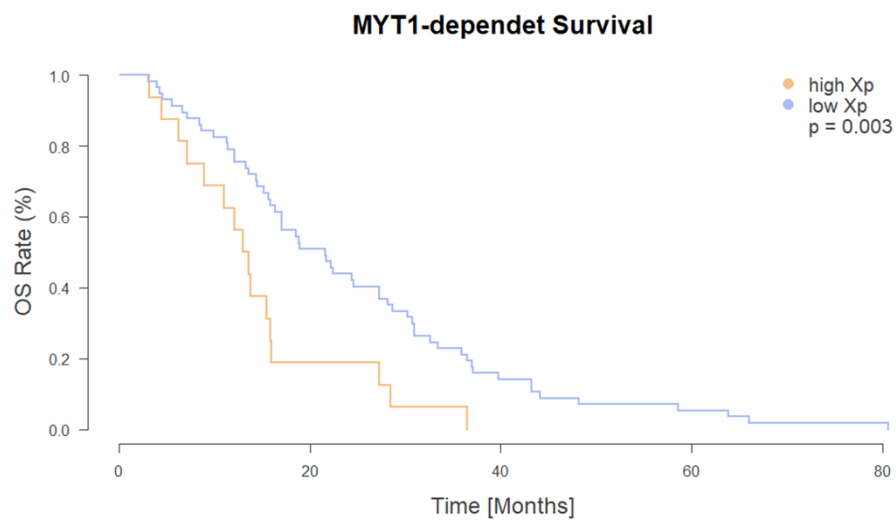

**Figure S1.** Kaplan-Meier curves for MYT1 expression demonstrated better OS with lower expression.

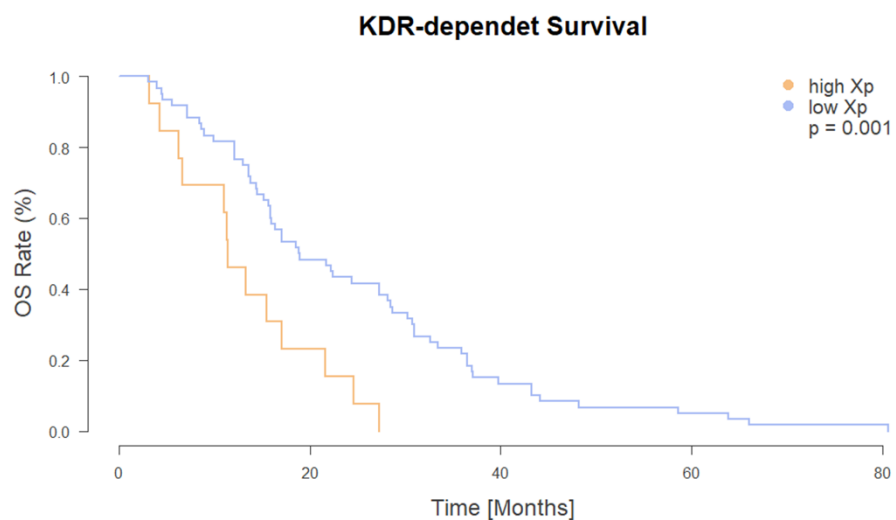

**Figure S2.** Kaplan-Meier curves for KDR expression demonstrated better OS with lower expression.

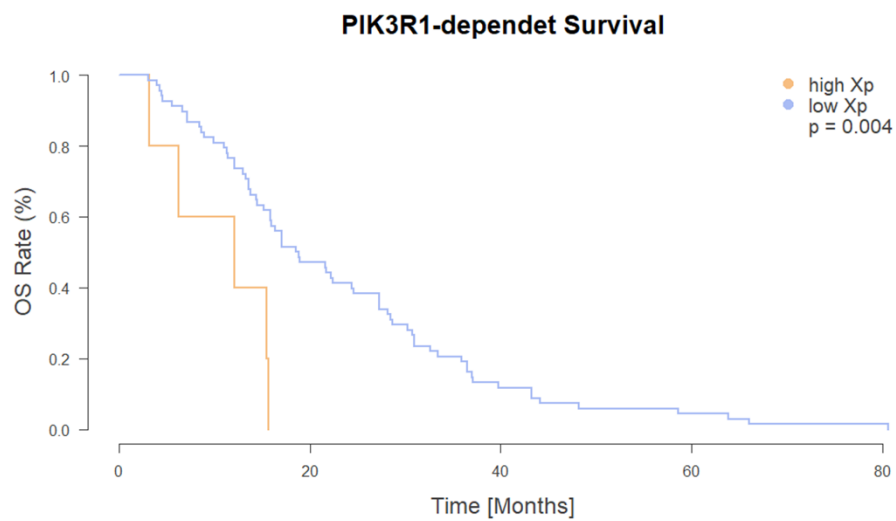

**Figure S3.** Kaplan-Meier curves for PIK3R1 expression demonstrated better OS with lower expression.

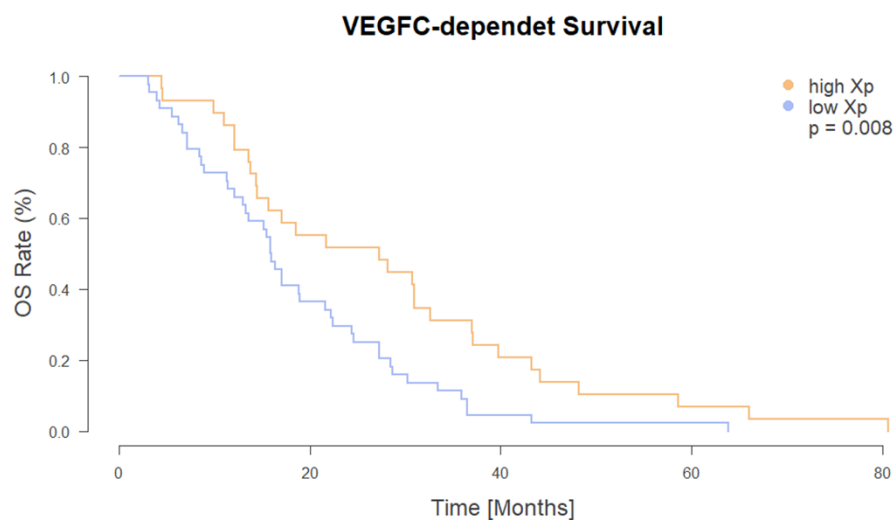

**Figure S4.** Kaplan-Meier curves for VEGFC expression demonstrated better OS with higher expression.

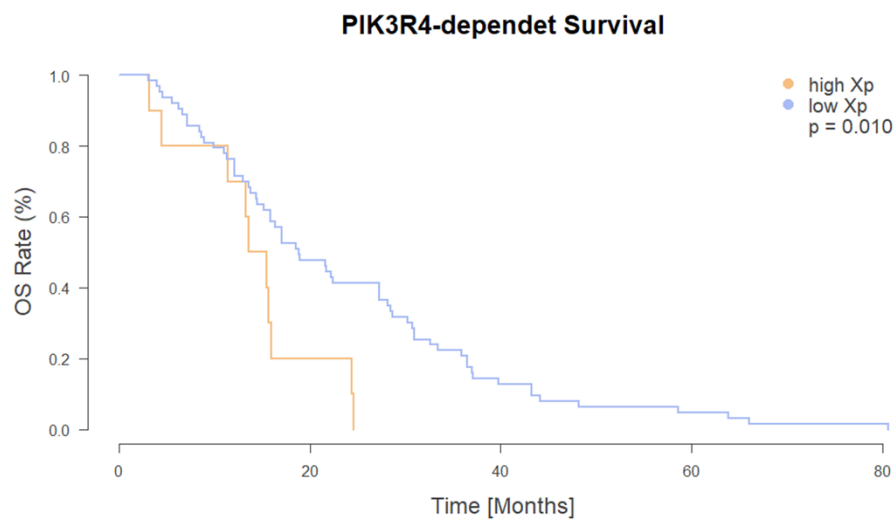

**Figure S5.** Kaplan-Meier curves for PIK3R4 expression demonstrated better OS with lower expression.

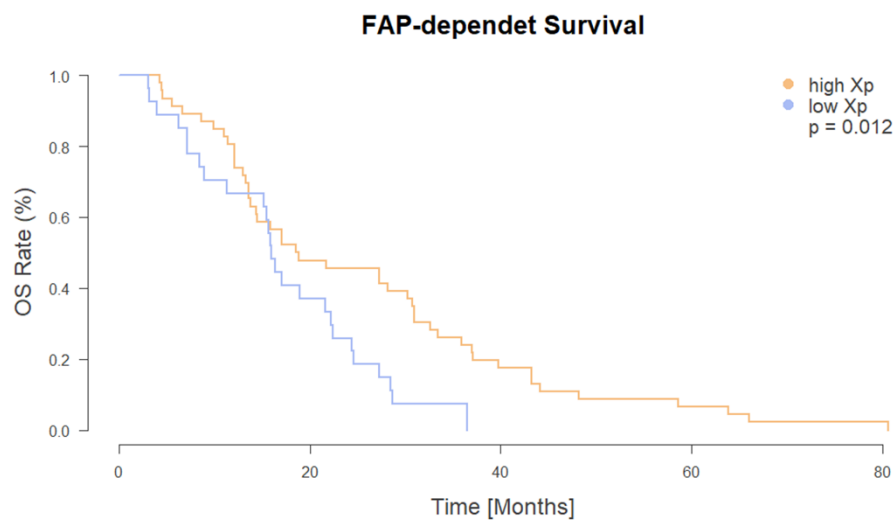

**Figure S6.** Kaplan-Meier curves for FAP expression demonstrated better OS with higher expression.

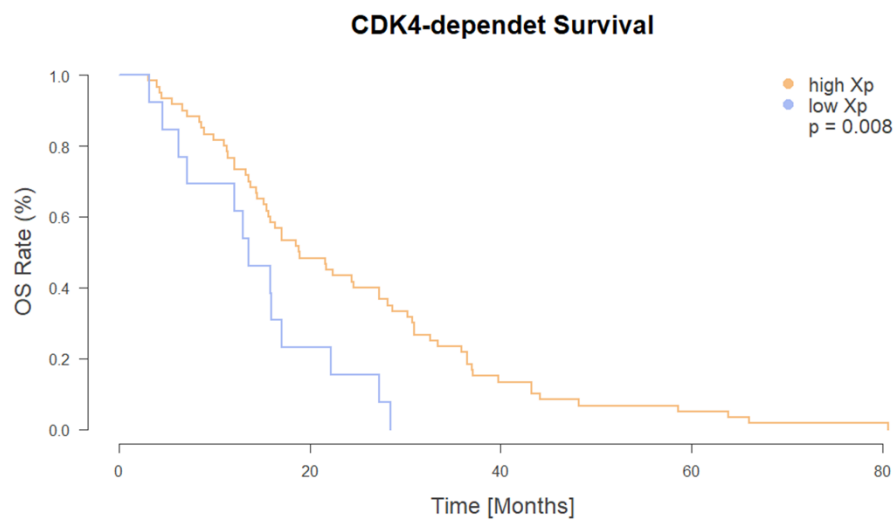

**Figure S7.** Kaplan-Meier curves for CDK4 expression demonstrated better OS with higher expression.

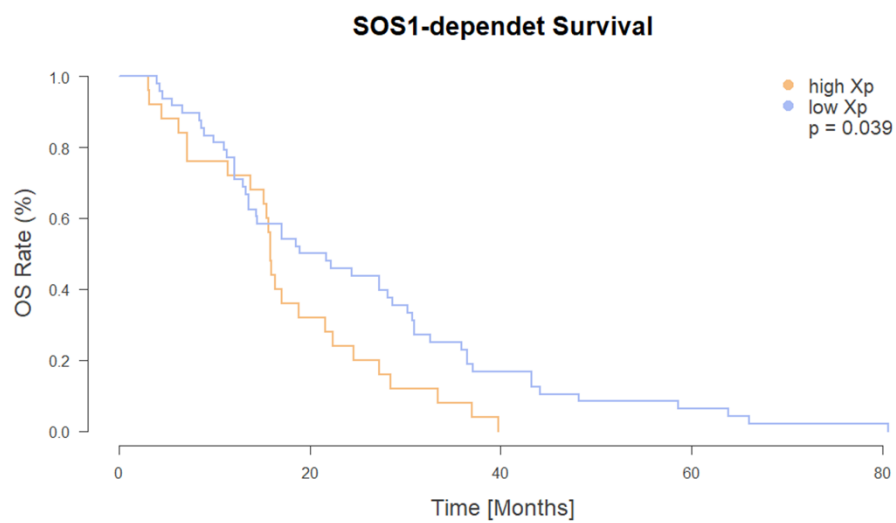

**Figure S8.** Kaplan-Meier curves for SOS-1 expression demonstrated better OS with lower expression.

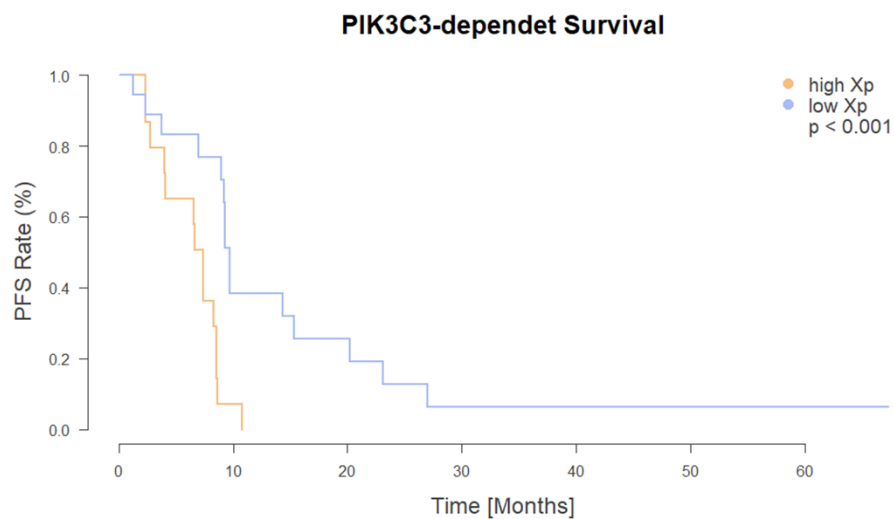

**Figure S9.** Kaplan-Meier curves for PIK3C3 expression demonstrated better PFS with lower expression.

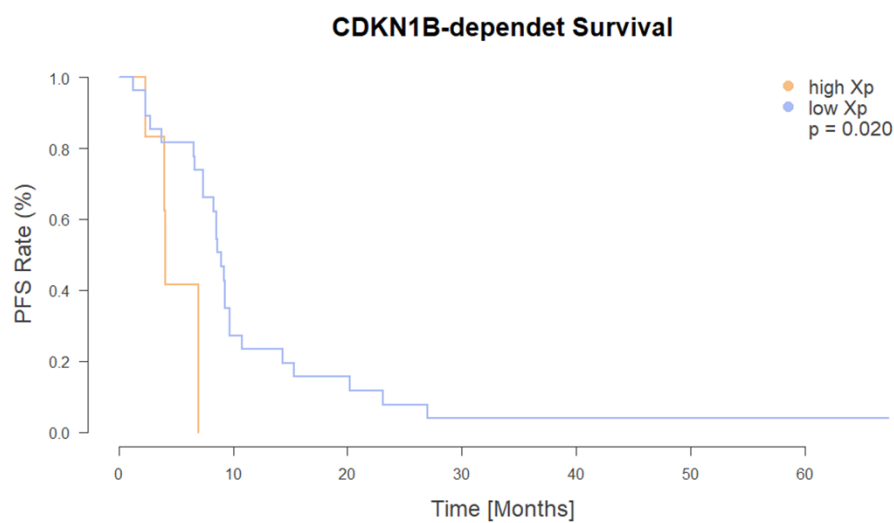

**Figure S10.** Kaplan-Meier curves for CDKN1B expression demonstrated better PFS with lower expression.

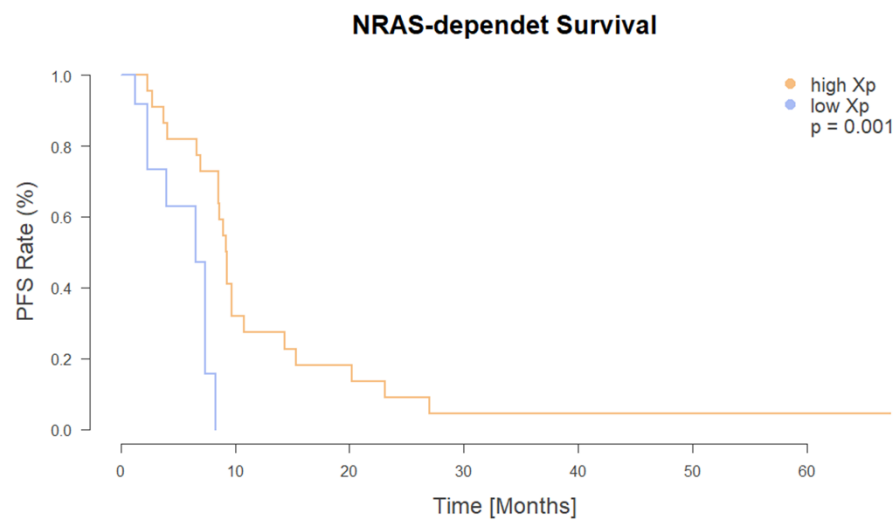

**Figure S11.** Kaplan-Meier curves for NRAS expression demonstrated better PFS with higher expression.

**Supplementary Table S1.** Significant marker found for overall survival (OS) and progression-free survival (PFS). HR = Hazard Ratio; NA = not available; DSR = desmoplastic stromal reaction

| <b>Overall Survival</b>          |                                           |                     |                |
|----------------------------------|-------------------------------------------|---------------------|----------------|
| <b>Marker</b>                    | <b>Median OS (95% CI)</b>                 | <b>HR (95% CI)</b>  | <b>p-Value</b> |
| Appearance of DSR                | 15.9 (13.8 - 27.3) vs. 18.7 (14.4 - 28.2) | 1.04 (0.59 - 1.58)  | 0.8730         |
| Amount of DSR                    | 15.9 (17.1 - 44.2) vs. 29.2 (13.3 - 44.2) | 1.21 (0.71 - 3.00)  | 0.6080         |
| High DSR vs. Others              | 29.2 (17.1 - 44.2) vs. 15.9 (11.4 - 27.3) | 1.75 (1.02 - 3.00)  | 0.0440         |
| FAP IHC                          | 16.0 (15.2 - 30.3) vs. 17.1 (13.6 - 24.6) | 1.04 (0.69 - 1.88)  | 0.0806         |
| FAP mRNA                         | 18.7 (14.4 - 30.9) vs. 16.0 (15.2 - 22.4) | 1.93 (1.15 - 3.24)  | 0.0120         |
| CDK4                             | 18.9 (15.6 - 28.2) vs. 13.6 (7.2 - NA)    | 2.31 (1.22 - 4.35)  | 0.0080         |
| KDR                              | 11.4 (6.7 - NA) vs. 18.9 (15.9 - 28.5)    | 0.36 (0.19 - 0.68)  | 0.0010         |
| MYT1                             | 13.3 (8.9 - 27.3) vs. 21.6 (16.4 - 28.2)  | 0.42 (0.24 - 0.76)  | 0.0030         |
| PIK3R1                           | 12.1 (6.2 - NA) vs. 18.7 (15.9 - 27.3)    | 0.27 (0.10 - 0.69)  | 0.0040         |
| PIK3R4                           | 14.5 (14.5 - NA) vs. 18.9 (15.9 - 28.2)   | 0.42 (0.21 - 0.85)  | 0.0100         |
| SOS1                             | 15.9 (15.2 - 22.4) vs. 20.4 (14.4 - 30.3) | 0.59 (0.35 - 0.98)  | 0.0390         |
| VEGFC                            | 27.3 (15.6 - 37.0) vs. 15.9 (13.3 - 22.2) | 1.93 (1.18 - 3.18)  | 0.0080         |
|                                  |                                           |                     |                |
| <b>Progression-free Survival</b> |                                           |                     |                |
| <b>Marker</b>                    | <b>Median PFS (95% CI)</b>                | <b>HR (95% CI)</b>  | <b>p-Value</b> |
| Appearance of DSR                | 9.7 (4.1 - NA) vs. 8.5 (7.4 - 9.3)        | 1.26 (0.51- 3.1)    | 0.5970         |
| Amount of DSR                    | 8.6 (6.7 - 9.7) vs. 8.9 ( 7.0 - NA)       | 1.38 (0.33 - 1.59)  | 0.8730         |
| FAP IHC                          | 9.7 (6.5 - NA) vs. 7.39 (6.7 - 9.3)       | 1.47 (0.66 - 3.25)  | 0.8070         |
| CDKN1B                           | 4.1 (3.9 - NA) vs. 8.9 (8.3 - 10.8)       | 0.25 (0.07 - 0.88)  | 0.0200         |
| NRAS                             | 9.3 (8.5 - 14.3) vs. 6.5 (4.0 - NA)       | 5.23 (1.74 - 15.72) | 0.0010         |
| PIK3C3                           | 7.4 (4.1 -8.6) vs. 9.7 (9.2 - 23.1)       | 0.24 (0.10 - 0.59)  | p<0.001        |

**Supplementary Table S2.** Overview of all calculated p-values related to OS and gene expression.

| Gene                              | Likelihood Ratio Test | Score (logrank) Test | Wald Test |
|-----------------------------------|-----------------------|----------------------|-----------|
| ABCB1 dependent Overall Survival  | 0.2300                | 0.2100               | 0.2100    |
| ACTA2 dependent Overall Survival  | 0.6500                | 0.6500               | 0.6500    |
| AKT1 dependent Overall Survival   | 0.5800                | 0.5800               | 0.5800    |
| ARAF dependent Overall Survival   | 0.0760                | 0.0650               | 0.0650    |
| ATG14 dependent Overall Survival  | 0.4500                | 0.4400               | 0.4400    |
| BECN1 dependent Overall Survival  | 0.3700                | 0.3500               | 0.3500    |
| BRAF dependent Overall Survival   | 0.6800                | 0.6700               | 0.6700    |
| CCNA2 dependent Overall Survival  | 0.6300                | 0.6400               | 0.6400    |
| CCND1 dependent Overall Survival  | 0.0410                | 0.0600               | 0.0610    |
| CCNE1 dependent Overall Survival  | 0.7700                | 0.7700               | 0.7700    |
| CD274 dependent Overall Survival  | 0.5000                | 0.4800               | 0.4800    |
| CD44 dependent Overall Survival   | 0.3600                | 0.3700               | 0.3700    |
| CD47 dependent Overall Survival   | 0.0760                | 0.0610               | 0.0600    |
| CDK1 dependent Overall Survival   | 0.6300                | 0.6300               | 0.6300    |
| CDK2 dependent Overall Survival   | 0.4500                | 0.4300               | 0.4300    |
| CDK4 dependent Overall Survival   | 0.0300                | 0.0360               | 0.0360    |
| CDK6 dependent Overall Survival   | 0.9300                | 0.9300               | 0.9300    |
| CDKN1A dependent Overall Survival | 0.3900                | 0.4000               | 0.4000    |
| CDKN1B dependent Overall Survival | 0.5000                | 0.4800               | 0.4900    |
| CDKN2A dependent Overall Survival | 0.7100                | 0.7000               | 0.7000    |
| CHRM3 dependent Overall Survival  | 0.1800                | 0.1400               | 0.1400    |
| CTNNB1 dependent Overall Survival | 0.2800                | 0.2900               | 0.2900    |
| EGF dependent Overall Survival    | 0.9000                | 0.9000               | 0.9000    |
| EGFR dependent Overall Survival   | 0.8200                | 0.8300               | 0.8300    |
| FAP dependent Overall Survival    | 0.0210                | 0.0340               | 0.0380    |
| FGF7 dependent Overall Survival   | 0.1600                | 0.1300               | 0.1400    |
| FLT1 dependent Overall Survival   | 0.5600                | 0.5700               | 0.5700    |
| FLT4 dependent Overall Survival   | 0.6200                | 0.6300               | 0.6300    |
| FN1 dependent Overall Survival    | 0.1400                | 0.1600               | 0.1600    |
| FZD10 dependent Overall Survival  | 0.2400                | 0.1900               | 0.1900    |
| FZD2 dependent Overall Survival   | 0.4500                | 0.4600               | 0.4600    |
| FZD5 dependent Overall Survival   | 0.0840                | 0.0590               | 0.0610    |
| HGF dependent Overall Survival    | 0.9200                | 0.9200               | 0.9200    |
| HRAS dependent Overall Survival   | 0.8800                | 0.8800               | 0.8800    |
| IGF1 dependent Overall Survival   | 0.4400                | 0.4500               | 0.4500    |
| KDR dependent Overall Survival    | 0.0120                | 0.0057               | 0.0067    |



|                                    |        |        |        |
|------------------------------------|--------|--------|--------|
| KRAS dependent Overall Survival    | 0.7200 | 0.7200 | 0.7200 |
| MAP2K1 dependent Overall Survival  | 0.7900 | 0.7900 | 0.7900 |
| MAP2K2 dependent Overall Survival  | 0.4600 | 0.4500 | 0.4500 |
| MAPK1 dependent Overall Survival   | 0.9400 | 0.9400 | 0.9400 |
| MDM2 dependent Overall Survival    | 0.7800 | 0.7800 | 0.7800 |
| MET dependent Overall Survival     | 0.5400 | 0.5300 | 0.5300 |
| MTOR dependent Overall Survival    | 0.4800 | 0.4800 | 0.4800 |
| MYC dependent Overall Survival     | 0.2000 | 0.1700 | 0.1800 |
| MYT1 dependent Overall Survival    | 0.0087 | 0.0015 | 0.0022 |
| NF1 dependent Overall Survival     | 0.7300 | 0.7300 | 0.7300 |
| NRAS dependent Overall Survival    | 0.3800 | 0.3800 | 0.3800 |
| PDGFB dependent Overall Survival   | 0.8500 | 0.8500 | 0.8500 |
| PIK3C3 dependent Overall Survival  | 0.1100 | 0.1000 | 0.1000 |
| PIK3CA dependent Overall Survival  | 0.3900 | 0.3800 | 0.3800 |
| PIK3R1 dependent Overall Survival  | 0.0130 | 0.0059 | 0.0062 |
| PIK3R4 dependent Overall Survival  | 0.0270 | 0.0220 | 0.0230 |
| PIK3R5 dependent Overall Survival  | 0.9700 | 0.9700 | 0.9700 |
| PTEN dependent Overall Survival    | 0.1900 | 0.1800 | 0.1800 |
| RAF1 dependent Overall Survival    | 0.5500 | 0.5400 | 0.5400 |
| RICTOR dependent Overall Survival  | 0.2900 | 0.2800 | 0.2800 |
| RPS6KB1 dependent Overall Survival | 0.0460 | 0.0510 | 0.0510 |
| RPTOR dependent Overall Survival   | 0.2900 | 0.2700 | 0.2700 |
| SMAD2 dependent Overall Survival   | 0.2000 | 0.2000 | 0.2000 |
| SMAD4 dependent Overall Survival   | 0.7200 | 0.7200 | 0.7200 |
| SMAD7 dependent Overall Survival   | 0.6700 | 0.6700 | 0.6700 |
| SOS1 dependent Overall Survival    | 0.0460 | 0.0390 | 0.0390 |
| SOS2 dependent Overall Survival    | 0.1900 | 0.1800 | 0.1800 |
| TGFA dependent Overall Survival    | 0.3600 | 0.3300 | 0.3300 |
| TGFB1 dependent Overall Survival   | 0.6700 | 0.6700 | 0.6700 |
| TGFBR1 dependent Overall Survival  | 0.2900 | 0.3100 | 0.3100 |
| TGFBR2 dependent Overall Survival  | 0.3800 | 0.3600 | 0.3600 |
| TP53 dependent Overall Survival    | 0.4000 | 0.4000 | 0.4000 |
| VEGFA dependent Overall Survival   | 0.9800 | 0.9800 | 0.9800 |

|                                  |        |        |        |
|----------------------------------|--------|--------|--------|
| VEGFC dependent Overall Survival | 0.0110 | 0.0160 | 0.0170 |
| WEE1 dependent Overall Survival  | 0.9000 | 0.9000 | 0.9000 |
| WNT1 dependent Overall Survival  | 0.0960 | 0.0520 | 0.0590 |
| WNT2 dependent Overall Survival  | 0.4400 | 0.4300 | 0.4300 |
| WNT3 dependent Overall Survival  | 0.4700 | 0.4500 | 0.4500 |

**Supplementary Table S3.** Overview of all the calculated p-values related to PFS and gene expression.

| Gene                                       | Likelihood Ratio Test | Score (logrank) Test | Wald Test |
|--------------------------------------------|-----------------------|----------------------|-----------|
| ABCB1 dependent Progression Free Survival  | 0.8600                | 0.8600               | 0.8600    |
| ACTA2 dependent Progression Free Survival  | 0.7900                | 0.7900               | 0.7900    |
| AKT1 dependent Progression Free Survival   | 0.9400                | 0.9400               | 0.9400    |
| ARAF dependent Progression Free Survival   | 0.4800                | 0.4500               | 0.4500    |
| ATG14 dependent Progression Free Survival  | 0.4300                | 0.4100               | 0.4100    |
| BECN1 dependent Progression Free Survival  | 0.0880                | 0.0690               | 0.0690    |
| BRAF dependent Progression Free Survival   | 0.7600                | 0.7500               | 0.7500    |
| CCNA2 dependent Progression Free Survival  | 0.4600                | 0.4700               | 0.4700    |
| CCND1 dependent Progression Free Survival  | 0.2200                | 0.2500               | 0.2500    |
| CCNE1 dependent Progression Free Survival  | 0.3000                | 0.2900               | 0.2900    |
| CD274 dependent Progression Free Survival  | 0.5600                | 0.5400               | 0.5400    |
| CD44 dependent Progression Free Survival   | 0.5900                | 0.6000               | 0.6000    |
| CD47 dependent Progression Free Survival   | 0.0840                | 0.0590               | 0.0590    |
| CDK1 dependent Progression Free Survival   | 0.7900                | 0.7900               | 0.7900    |
| CDK2 dependent Progression Free Survival   | 0.2000                | 0.1900               | 0.1900    |
| CDK4 dependent Progression Free Survival   | 0.4900                | 0.5000               | 0.5000    |
| CDK6 dependent Progression Free Survival   | 0.8200                | 0.8200               | 0.8200    |
| CDKN1A dependent Progression Free Survival | 0.5900                | 0.6000               | 0.6000    |
| CDKN1B dependent Progression Free Survival | 0.0460                | 0.0210               | 0.0240    |
| CDKN2A dependent Progression Free Survival | 0.1300                | 0.0800               | 0.0910    |
| CHRM3 dependent Progression Free Survival  | 0.5400                | 0.5100               | 0.5200    |
| CTNNB1 dependent Progression Free Survival | 0.3000                | 0.3100               | 0.3100    |
| EGF dependent Progression Free Survival    | 0.2000                | 0.1500               | 0.1600    |
| EGFR dependent Progression Free Survival   | 0.7100                | 0.7100               | 0.7100    |
| FAP dependent Progression Free Survival    | 0.3500                | 0.3700               | 0.3700    |
| FGF7 dependent Progression Free Survival   | 0.3900                | 0.3500               | 0.3600    |
| FLT1 dependent Progression Free Survival   | 0.5800                | 0.5700               | 0.5700    |
| FLT4 dependent Progression Free Survival   | 0.6700                | 0.6800               | 0.6800    |
| FN1 dependent Progression Free Survival    | 0.1900                | 0.2100               | 0.2100    |
| FZD10 dependent Progression Free Survival  | 0.6500                | 0.6300               | 0.6400    |

|                                             |        |        |        |
|---------------------------------------------|--------|--------|--------|
| FZD2 dependent Progression Free Survival    | 0.3700 | 0.3900 | 0.3900 |
| FZD5 dependent Progression Free Survival    | 0.5700 | 0.5600 | 0.5600 |
| HGF dependent Progression Free Survival     | 0.9900 | 0.9900 | 0.9900 |
| HRAS dependent Progression Free Survival    | 0.3500 | 0.3400 | 0.3500 |
| IGF1 dependent Progression Free Survival    | 0.4200 | 0.4100 | 0.4100 |
| KDR dependent Progression Free Survival     | 0.3600 | 0.3400 | 0.3400 |
| KRAS dependent Progression Free Survival    | 0.6000 | 0.5900 | 0.5900 |
| MAP2K1 dependent Progression Free Survival  | 0.5200 | 0.5100 | 0.5100 |
| MAP2K2 dependent Progression Free Survival  | 0.2800 | 0.2600 | 0.2600 |
| MAPK1 dependent Progression Free Survival   | 0.3800 | 0.3800 | 0.3800 |
| MDM2 dependent Progression Free Survival    | 0.8200 | 0.8200 | 0.8200 |
| MET dependent Progression Free Survival     | 0.8500 | 0.8500 | 0.8500 |
| MTOR dependent Progression Free Survival    | 0.3100 | 0.3000 | 0.3000 |
| MYC dependent Progression Free Survival     | 0.9500 | 0.9500 | 0.9500 |
| MYT1 dependent Progression Free Survival    | 0.8500 | 0.8500 | 0.8500 |
| NF1 dependent Progression Free Survival     | 0.2900 | 0.3000 | 0.3000 |
| NRAS dependent Progression Free Survival    | 0.0160 | 0.0210 | 0.0200 |
| PDGFB dependent Progression Free Survival   | 0.7400 | 0.7400 | 0.7400 |
| PIK3C3 dependent Progression Free Survival  | 0.0140 | 0.0100 | 0.0100 |
| PIK3CA dependent Progression Free Survival  | 0.1500 | 0.1600 | 0.1600 |
| PIK3R1 dependent Progression Free Survival  | 0.9500 | 0.9500 | 0.9500 |
| PIK3R4 dependent Progression Free Survival  | 0.3900 | 0.3700 | 0.3700 |
| PIK3R5 dependent Progression Free Survival  | 0.7500 | 0.7500 | 0.7500 |
| PTEN dependent Progression Free Survival    | 0.3100 | 0.3000 | 0.3000 |
| RAF1 dependent Progression Free Survival    | 0.4600 | 0.4500 | 0.4500 |
| RICTOR dependent Progression Free Survival  | 0.2700 | 0.2600 | 0.2600 |
| RPS6KB1 dependent Progression Free Survival | 0.8800 | 0.8800 | 0.8800 |
| RPTOR dependent Progression Free Survival   | 0.3000 | 0.2800 | 0.2800 |
| SMAD2 dependent Progression Free Survival   | 0.1800 | 0.1700 | 0.1700 |
| SMAD4 dependent Progression Free Survival   | 0.1800 | 0.1700 | 0.1700 |
| SMAD7 dependent Progression Free Survival   | 0.8900 | 0.8900 | 0.8900 |
| SOS1 dependent Progression Free Survival    | 0.2600 | 0.2400 | 0.2400 |
| SOS2 dependent Progression Free Survival    | 0.6900 | 0.6800 | 0.6800 |
| TGFA dependent Progression Free Survival    | 0.6200 | 0.6000 | 0.6000 |

|                                            |        |        |        |
|--------------------------------------------|--------|--------|--------|
| TGFB1 dependent Progression Free Survival  | 0.2900 | 0.3100 | 0.3200 |
| TGFBR1 dependent Progression Free Survival | 0.0460 | 0.0660 | 0.0700 |
| TGFBR2 dependent Progression Free Survival | 0.8000 | 0.8000 | 0.8000 |
| TP53 dependent Progression Free Survival   | 0.6400 | 0.6400 | 0.6500 |
| VEGFA dependent Progression Free Survival  | 0.9500 | 0.9500 | 0.9500 |
| VEGFC dependent Progression Free Survival  | 0.3900 | 0.4100 | 0.4100 |
| WEE1 dependent Progression Free Survival   | 0.6700 | 0.6800 | 0.6900 |
| WNT1 dependent Progression Free Survival   | 0.8700 | 0.8700 | 0.8700 |
| WNT2 dependent Progression Free Survival   | 0.7300 | 0.7300 | 0.7300 |
| WNT3 dependent Progression Free Survival   | 0.1100 | 0.0690 | 0.0770 |

**Supplementary Table S4.** Targets of the respective pathways in the custom-designed codeset used for digital gene expression analysis.

| Cell cycle  |               | PI3K signaling |               | MAPK          |               | Wnt           |             | Growth signaling |              | TGF- $\beta$  | Fibroblasts  |
|-------------|---------------|----------------|---------------|---------------|---------------|---------------|-------------|------------------|--------------|---------------|--------------|
| <i>CDK1</i> | <i>CDKN2A</i> | <i>PIK3C3</i>  | <i>AKT1</i>   | <i>MAP2K1</i> | <i>SOS1</i>   | <i>CTNNB1</i> | <i>FZD2</i> | <i>EGFR</i>      | <i>KDR</i>   | <i>TGFB1</i>  | <i>ACTA2</i> |
| <i>CDK2</i> | <i>CDKN1B</i> | <i>ATG14</i>   | <i>PIK3CA</i> | <i>KRAS</i>   | <i>SOS2</i>   | <i>WNT1</i>   | <i>FZD5</i> | <i>TGFA</i>      | <i>PDGFB</i> | <i>TGFBR1</i> | <i>FAP</i>   |
| <i>CDK4</i> | <i>CDKN1A</i> | <i>PIK3R5</i>  | <i>MTOR</i>   | <i>MAPK1</i>  | <i>NF1</i>    | <i>WNT2</i>   |             | <i>EGF</i>       | <i>IGF1</i>  | <i>TGFBR2</i> | <i>FN1</i>   |
| <i>CDK6</i> | <i>CCND1</i>  | <i>PIK3R4</i>  | <i>PTEN</i>   | <i>BRAF</i>   | <i>MAP2K2</i> | <i>CD47</i>   |             | <i>HGF</i>       | <i>VEGFC</i> | <i>CD44</i>   |              |
| <i>MDM2</i> | <i>CCNA2</i>  | <i>PIK3R1</i>  | <i>RICTOR</i> | <i>CHRM3</i>  | <i>RAF1</i>   | <i>CD274</i>  |             | <i>FGF1</i>      | <i>MET</i>   | <i>SMAD4</i>  |              |
| <i>TP53</i> | <i>CCNB3</i>  | <i>PIK3CA</i>  | <i>RPTOR</i>  | <i>HRAS</i>   |               | <i>ABCB1</i>  |             | <i>VEGFA</i>     |              | <i>SMAD2</i>  |              |
| <i>WEE1</i> | <i>CCNE1</i>  | <i>RPS6KB1</i> |               | <i>NRAS</i>   |               | <i>WNT3</i>   |             | <i>FLT1</i>      |              | <i>SMAD7</i>  |              |
| <i>Myt1</i> |               | <i>BECN1</i>   |               | <i>ARAF</i>   |               | <i>FZD10</i>  |             | <i>FLT4</i>      |              | <i>MYC</i>    |              |
